# Supplementary material for: Walking on different inclines affects gait symmetry differently in the anterior-posterior and vertical directions: implication for future sensorimotor training
Source: PeerJ. 2024 Sep 16;12:e18096. doi: 10.7717/peerj.18096 (PMC11412221; doi:10.7717/peerj.18096)
Supplement: Supplemental Information 1 [file peerj-12-18096-s001.xlsx]

## Sheet: Gait characteristics
	De8						De15						In8						In15						Level
Step time	Step time R	Step time L			SI		Step time R	Step time L			SI		Step time R	Step time L			SI		Step time R	Step time L			SI		Step time R	Step time L			SI
Sub01	0.485546	0.496303	0.0107563	0.981849	0.0219103		0.474836	0.486639	0.0118033	0.961475	0.0245524	0.0245524	0.513304	0.524643	0.0113393	1.03795	0.0218495		0.503421	0.519298	0.0158772	1.02272	0.031049		0.510862	0.498448	0.0124138	1.00931	0.0245986
Sub02	0.544862	0.528165	0.0166972	1.07303	0.0311218		0.52	0.505439	0.0145614	1.02544	0.0284003	0.0284003	0.559528	0.535849	0.0236792	1.09538	0.0432349		0.538426	0.544352	0.00592593	1.08278	0.0109458		0.559528	0.542358	0.0171698	1.10189	0.0311644
Sub03	0.516607	0.519375	0.00276786	1.03598	0.00534345		0.501453	0.498462	0.00299145	0.999915	0.00598342	0.00598342	0.547143	0.568667	0.0215238	1.11581	0.0385797		0.536355	0.549439	0.0130841	1.08579	0.0241005		0.525046	0.542569	0.0175229	1.06761	0.0328263
Sub04	0.505614	0.511842	0.00622807	1.01746	0.0122424		0.480661	0.481736	0.00107438	0.962397	0.00223272	0.00223272	0.544815	0.539259	0.00555556	1.08407	0.0102494		0.532407	0.548519	0.0161111	1.08093	0.0298098		0.524595	0.523243	0.00135135	1.04784	0.00257931
Sub05	0.490684	0.501795	0.0111111	0.992479	0.0223906		0.476016	0.472764	0.00325203	0.94878	0.00685518	0.00685518	1.52833	0.507018	1.02132	2.03535	1.00358		0.483	0.48875	0.00575	0.97175	0.0118343		1.54142	0.513097	1.02832	2.05451	1.00103
Sub06	0.524775	0.530991	0.00621622	1.05577	0.0117757		0.519554	0.522143	0.00258929	1.0417	0.00497129	0.00497129	0.552692	0.565865	0.0131731	1.11856	0.0235537		1.68311	0.555437	1.12767	2.23854	1.0075		0.532636	0.539909	0.00727273	1.07255	0.0135616
Sub07	0.559238	0.549429	0.00980952	1.10867	0.0176961		0.567048	0.544571	0.0224762	1.11162	0.0404387	0.0404387	1.83755	0.604574	1.23298	2.44213	1.00976		0.598854	0.603542	0.0046875	1.2024	0.00779693		1.81411	0.599368	1.21474	2.41347	1.00663
Sub08	0.579706	0.562843	0.0168627	1.14255	0.0295178		0.517895	0.504561	0.0133333	1.02246	0.026081	0.026081	0.63413	0.628152	0.00597826	1.26228	0.00947214		0.639	0.656	0.017	1.295	0.0262548		1.77704	0.594184	1.18286	2.37122	0.997676
Sub09	0.567059	0.574314	0.0072549	1.14137	0.0127126		0.52787	0.550833	0.022963	1.0787	0.0425751	0.0425751	0.631522	0.626957	0.00456522	1.25848	0.00725514		0.641429	0.636813	0.00461538	1.27824	0.00722146		0.591031	0.614433	0.0234021	1.20546	0.0388266
Sub10	0.613053	0.610421	0.00263158	1.22347	0.00430182		0.570294	0.56902	0.00127451	1.13931	0.00223733	0.00223733	0.711975	0.720864	0.00888889	1.43284	0.0124074		0.754	0.787333	0.0333333	1.54133	0.0432526		0.669302	0.683023	0.0137209	1.35233	0.0202923
Sub11	0.539174	0.528807	0.010367	1.06798	0.0194141		0.5425	0.529167	0.0133333	1.07167	0.0248834	0.0248834	0.55537	0.528796	0.0265741	1.08417	0.0490221		0.567619	0.542286	0.0253333	1.1099	0.0456496		0.552336	0.541121	0.011215	1.09346	0.0205128
Sub12	0.592245	0.587449	0.00479592	1.17969	0.00813078		0.5876	0.5771	0.0105	1.1647	0.0180304	0.0180304	0.615761	0.646304	0.0305435	1.26207	0.0484024		0.612258	0.630108	0.0178495	1.24237	0.0287346		0.634066	0.643846	0.00978022	1.27791	0.0153066
Sub13	0.606804	0.59134	0.0154639	1.19814	0.0258131		0.5954	0.5671	0.0283	1.1625	0.0486882	0.0486882	0.670698	0.671279	0.000581395	1.34198	0.000866476		0.669176	0.682353	0.0131765	1.35153	0.0194986		0.629022	0.623261	0.00576087	1.25228	0.00920059
Sub14	0.538519	0.543333	0.00481481	1.08185	0.00890106		0.510175	0.513509	0.00333333	1.02368	0.00651243	0.00651243	0.58	0.591616	0.0116162	1.17162	0.0198293		0.589796	0.594286	0.0044898	1.18408	0.00758359		0.548269	0.56875	0.0204808	1.11702	0.0366704
Sub15	0.613789	0.616316	0.00252632	1.23011	0.00410748		0.601053	0.617053	0.016	1.21811	0.0262703	0.0262703	0.658182	0.658295	0.000113636	1.31648	0.000172637		0.690588	0.673647	0.0169412	1.36424	0.0248362		1.93033	0.641444	1.28889	2.57178	1.00233
Sub16	0.599794	0.593402	0.00639175	1.1932	0.0107137		0.561048	0.54981	0.0112381	1.11086	0.0202332	0.0202332	0.610625	0.59375	0.016875	1.20437	0.0280228		0.62871	0.621183	0.00752688	1.24989	0.012044		0.616804	0.581546	0.0352577	1.19835	0.0588438
Sub17	0.5827	0.5759	0.0068	1.1586	0.0117383		0.546636	0.538505	0.00813084	1.08514	0.0149858	0.0149858	0.616848	0.639348	0.0225	1.2562	0.0358224		0.625109	0.634565	0.00945652	1.25967	0.0150142		0.600737	0.619368	0.0186316	1.22011	0.0305409
Sub18	0.567115	0.548558	0.0185577	1.11567	0.0332673		0.53578	0.535413	0.000366972	1.07119	0.000685166	0.000685166	1.71608	0.577157	1.13892	2.29324	0.993288		0.563619	0.54581	0.0178095	1.10943	0.0321058		0.554	0.552	0.002	1.106	0.00361664
	De8						De15						In8						In15						Level
Step length	step length R	step length L			SI		step length R	step length L			SI		step length R	step length L			SI						SI						SI
Sub01	0.627031	0.615464	0.0115676	1.2425	0.01862		0.605731	0.595289	0.0104422	1.20102	0.0173888		0.291799	0.315764	0.0239641	0.607563	0.078886		0.294173	0.308499	0.014326	0.602672	0.0475417		0.275254	0.257702	0.0175525	0.532956	0.0658683
Sub02	0.675617	0.686153	0.0105363	1.36177	0.0154744		0.632729	0.642404	0.00967508	1.27513	0.015175		0.356674	0.326609	0.0300651	0.683283	0.0880018		0.339893	0.3247	0.0151924	0.664593	0.0457194		0.347887	0.318373	0.0295147	0.66626	0.0885983
Sub03	0.599478	0.601956	0.00247866	1.20143	0.00412617		0.569156	0.572237	0.00308042	1.14139	0.00539765		0.295023	0.310757	0.0157336	0.60578	0.0519451		0.300945	0.320463	0.0195175	0.621408	0.062817		0.241401	0.256912	0.0155111	0.498313	0.0622545
Sub04	0.615161	0.612167	0.00299418	1.22733	0.00487918		0.561428	0.561135	0.000292736	1.12256	0.000521548		0.307437	0.296023	0.0114142	0.603459	0.0378292		0.326577	0.322803	0.00377357	0.64938	0.0116221		0.27308	0.266584	0.00649595	0.539663	0.0240741
Sub05	0.594508	0.582214	0.0122936	1.17672	0.0208946		0.542654	0.547069	0.00441484	1.08972	0.00810268		0.285345	0.313054	0.0277088	0.598399	0.0926099		0.250575	0.273215	0.0226402	0.52379	0.0864475		0.246933	0.274217	0.0272843	0.52115	0.104708
Sub06	0.575775	0.566064	0.00971083	1.14184	0.0170091		0.55227	0.550659	0.0016115	1.10293	0.00292222		0.279741	0.301795	0.0220534	0.581536	0.0758454		0.291083	0.307075	0.0159922	0.598158	0.0534715		0.245627	0.25737	0.0117424	0.502997	0.0466899
Sub07	0.356686	0.363126	0.00643991	0.719813	0.0178933		0.349123	0.366021	0.0168984	0.715144	0.0472587		0.206513	0.221597	0.0150839	0.428109	0.0704673		0.207117	0.212974	0.00585664	0.420091	0.0278827		0.17985	0.18383	0.00397984	0.363681	0.0218865
Sub08	0.609393	0.62497	0.0155765	1.23436	0.0252382		0.533082	0.542921	0.00983883	1.076	0.0182877		0.34636	0.351566	0.00520609	0.697925	0.0149188		0.37646	0.390611	0.0141511	0.767071	0.0368965		0.289662	0.286033	0.00362905	0.575696	0.0126075
Sub09	0.61887	0.607935	0.0109353	1.2268	0.0178272		0.573031	0.557605	0.0154262	1.13064	0.0272877		0.372058	0.356392	0.015666	0.728451	0.0430119		0.39212	0.369188	0.0229317	0.761308	0.0602429		0.305302	0.316537	0.0112354	0.621839	0.0361361
Sub10	0.394533	0.392936	0.00159721	0.78747	0.00405656		0.364846	0.364475	0.000371725	0.729321	0.00101937		0.297637	0.293583	0.00405331	0.59122	0.0137117		0.336461	0.349781	0.0133201	0.686242	0.0388203		0.242295	0.246292	0.00399724	0.488586	0.0163625
Sub11	0.540962	0.545517	0.00455573	1.08648	0.00838623		0.527812	0.544061	0.01625	1.07187	0.0303207		0.238167	0.220128	0.0180392	0.458295	0.0787231		0.264568	0.252472	0.0120959	0.517039	0.0467889		0.167528	0.160024	0.00750381	0.327552	0.0458176
Sub12	0.585303	0.594434	0.00913127	1.17974	0.0154802		0.568121	0.572083	0.00396184	1.1402	0.00694935		0.330104	0.342216	0.0121116	0.672321	0.0360294		0.324079	0.338429	0.0143497	0.662508	0.0433194		0.340894	0.351593	0.0106988	0.692487	0.0308996
Sub13	0.596445	0.608402	0.0119571	1.20485	0.0198484		0.559132	0.580813	0.0216812	1.13994	0.0380391		0.405426	0.410605	0.0051786	0.816032	0.0126922		0.405147	0.412219	0.00707173	0.817366	0.0173037		0.348233	0.333144	0.0150891	0.681376	0.0442901
Sub14	0.658833	0.655411	0.00342196	1.31424	0.0052075		0.603279	0.606066	0.00278721	1.20935	0.00460945		0.358885	0.353582	0.00530286	0.712466	0.0148859		0.372232	0.368662	0.00357031	0.740894	0.00963783		0.313078	0.318047	0.00496968	0.631125	0.0157486
Sub15	0.538933	0.534586	0.00434688	1.07352	0.00809838		0.532004	0.518441	0.0135635	1.05044	0.0258243		0.304306	0.30863	0.00432469	0.612936	0.0141114		0.344778	0.334836	0.00994228	0.679614	0.0292586		0.273213	0.278471	0.00525803	0.551683	0.0190618
Sub16	0.588156	0.58803	0.00012632	1.17619	0.000214795		0.537343	0.539826	0.00248224	1.07717	0.00460882		0.32037	0.304013	0.016357	0.624383	0.0523941		0.355102	0.353616	0.00148656	0.708718	0.00419507		0.291097	0.283385	0.00771238	0.574482	0.0268498
Sub17	0.502955	0.504603	0.00164857	1.00756	0.00327241		0.465004	0.467106	0.00210243	0.93211	0.00451112		0.293374	0.309723	0.0163493	0.603098	0.0542176		0.299036	0.312371	0.0133355	0.611407	0.0436222		0.268366	0.280995	0.0126294	0.549361	0.0459784
Sub18	0.4751	0.491334	0.0162336	0.966434	0.0335948		0.457408	0.459212	0.00180431	0.91662	0.00393688		0.242215	0.2518	0.00958475	0.494015	0.0388035		0.24561	0.254378	0.00876831	0.499988	0.0350741		0.200399	0.204269	0.00386951	0.404668	0.0191244
	De8						De15						In8						In15						Level
Step width	step width R	step width L			SI		step width R	step width L			SI		step width R	step width L			SI						SI						SI
Sub01	0.120563	0.120573	1.03782e-05	0.241136	8.6077e-05		0.122057	0.121901	0.00015623	0.243958	0.00128079		0.193085	0.193338	0.000253036	0.386423	0.00130963		0.177204	0.177249	4.49912e-05	0.354452	0.000253863		0.0792356	0.0790635	0.000172138	0.158299	0.00217484
Sub02	0.132494	0.132198	0.000295917	0.264691	0.00223594		0.118567	0.118778	0.000210289	0.237345	0.00177201		0.155264	0.155396	0.000131585	0.310659	0.000847133		0.167651	0.167615	3.6037e-05	0.335266	0.000214976		0.188298	0.188239	5.86698e-05	0.376537	0.000311628
Sub03	0.0479682	0.0464875	0.0014807	0.0944558	0.0313522		0.0673377	0.0667195	0.000618248	0.134057	0.00922364		0.208434	0.209673	0.00123906	0.418108	0.00592698		0.210199	0.210157	4.10935e-05	0.420356	0.000195517		0.214119	0.214532	0.000412385	0.428651	0.00192411
Sub04	0.113705	0.113957	0.000251746	0.227662	0.00221158		0.113162	0.113033	0.000129107	0.226195	0.00114156		0.169205	0.168969	0.000235704	0.338174	0.00139398		0.169676	0.169648	2.81759e-05	0.339325	0.000166071		0.178669	0.178515	0.000154243	0.357185	0.000863661
Sub05	0.143992	0.143932	5.93419e-05	0.287924	0.000412205		0.14335	0.143395	4.56667e-05	0.286745	0.000318518		0.154537	0.154493	4.41228e-05	0.309031	0.000285556		0.161178	0.161164	1.41167e-05	0.322343	8.75879e-05		0.189447	0.189663	0.000215301	0.37911	0.00113582
Sub06	0.0826401	0.0823299	0.000310189	0.16497	0.00376055		0.0867359	0.0869453	0.000209375	0.173681	0.00241103		0.14855	0.148544	6.39423e-06	0.297094	4.30452e-05		0.122438	0.122268	0.000169786	0.244706	0.00138767		0.197096	0.196987	0.000109418	0.394083	0.000555306
Sub07	0.135351	0.135064	0.000286476	0.270415	0.00211879		0.131199	0.131739	0.0005402	0.262938	0.00410895		0.227098	0.227304	0.000206564	0.454402	0.000909168		0.221515	0.220898	0.000617417	0.442413	0.00279113		0.212108	0.212094	1.43368e-05	0.424202	6.75944e-05
Sub08	0.113918	0.113775	0.000142824	0.227692	0.00125453		0.154055	0.154128	7.34211e-05	0.308184	0.000476476		0.233003	0.232732	0.000271196	0.465735	0.00116459		0.193998	0.193945	5.36333e-05	0.387943	0.000276501		0.27093	0.270705	0.000225602	0.541635	0.000833041
Sub09	0.178948	0.179718	0.000769941	0.358665	0.00429337		0.150651	0.150735	8.36852e-05	0.301385	0.000555337		0.23353	0.233697	0.00016613	0.467227	0.000711134		0.220011	0.21981	0.000200879	0.439821	0.000913459		0.262503	0.262304	0.000199165	0.524806	0.000759004
Sub10	0.125726	0.125858	0.000132074	0.251584	0.00104994		0.128285	0.128792	0.000507775	0.257077	0.00395037		0.157325	0.157129	0.000195728	0.314454	0.00124488		0.178477	0.178611	0.000134307	0.357088	0.000752232		0.17662	0.176464	0.000156488	0.353084	0.000886409
Sub11	0.137389	0.137921	0.00053255	0.27531	0.00386874		0.141786	0.141485	0.000301315	0.283271	0.0021274		0.151698	0.151991	0.000293343	0.303689	0.00193186		0.145424	0.145474	4.95238e-05	0.290898	0.000340489		0.188655	0.188518	0.000137383	0.377173	0.000728488
Sub12	0.144182	0.143826	0.000355663	0.288008	0.00246982		0.140411	0.140561	0.00014999	0.280972	0.00106765		0.197789	0.197731	5.8337e-05	0.395521	0.000294988		0.16413	0.163978	0.00015228	0.328108	0.000928228		0.201816	0.2021	0.000284352	0.403916	0.00140797
Sub13	0.152015	0.152226	0.000210227	0.304241	0.00138198		0.134742	0.13477	2.876e-05	0.269512	0.000213423		0.146319	0.145927	0.000392047	0.292246	0.00268299		0.137697	0.13765	4.69412e-05	0.275347	0.00034096		0.15344	0.154075	0.00063537	0.307515	0.00413229
Sub14	0.115726	0.115633	9.34259e-05	0.231359	0.000807627		0.122015	0.121856	0.000158614	0.243871	0.0013008		0.205532	0.205428	0.00010397	0.41096	0.000505985		0.189195	0.189264	6.9102e-05	0.378459	0.000365176		0.21223	0.212436	0.000206385	0.424666	0.000971985
Sub15	0.137811	0.137832	2.13053e-05	0.275643	0.000154586		0.146905	0.146659	0.000245379	0.293564	0.00167172		0.240926	0.240316	0.000610318	0.481242	0.00253643		0.207409	0.20761	0.0002018	0.415019	0.000972486		0.268236	0.268649	0.000413322	0.536885	0.00153971
Sub16	0.161538	0.161011	0.000526701	0.322549	0.00326587		0.193701	0.193452	0.000249257	0.387154	0.00128764		0.218108	0.2181	7.30208e-06	0.436208	3.34798e-05		0.220655	0.220872	0.000216645	0.441526	0.000981346		0.258147	0.258525	0.000377918	0.516673	0.00146289
Sub17	0.131318	0.131042	0.00027626	0.262361	0.00210596		0.164907	0.165231	0.000323981	0.330139	0.0019627		0.167502	0.16747	3.16087e-05	0.334972	0.000188725		0.162785	0.162825	4.04022e-05	0.32561	0.000248163		0.211701	0.212022	0.000320653	0.423723	0.0015135
Sub18	0.0857602	0.0857857	2.55096e-05	0.171546	0.000297409		0.0873068	0.0872477	5.91284e-05	0.174555	0.000677478		0.135343	0.13545	0.00010699	0.270792	0.000790202		0.133734	0.133518	0.0002162	0.267253	0.00161795		0.160746	0.160874	0.000128676	0.32162	0.000800175

## Sheet: Gait variabilities
	De8						De15						In8						In15						Level
	Step time R	Step time L			SI		Step time R	Step time L			SI		Step time R	Step time L			SI		Step time R	Step time L			SI		Step time R	Step time L			SI
Sub01	2.62297	2.74953	0.126557	5.3725	0.0471128		2.01224	2.94912	0.936879	4.96136	0.37767		1.66191	1.55479	0.107123	3.2167	0.0666041		1.64673	1.75108	0.104355	3.39781	0.0614248		1.72337	1.28539	0.437984	3.00876	0.29114
Sub02	2.77684	2.84778	0.070941	5.62463	0.0252251		2.80261	2.83661	0.033993	5.63922	0.0120559		2.00967	1.83696	0.172704	3.84663	0.0897952		2.38417	2.43858	0.0544082	4.82276	0.0225631		1.97916	1.77312	0.206044	3.75227	0.109824
Sub03	2.36081	2.48273	0.121918	4.84354	0.0503427		2.73714	3.02209	0.284957	5.75923	0.0989567		2.91982	2.8341	0.0857258	5.75392	0.0297974		3.08802	3.61277	0.524749	6.7008	0.156623		2.50784	2.72917	0.221336	5.23701	0.0845276
Sub04	2.67085	2.63233	0.0385141	5.30318	0.0145249		3.1976	3.00431	0.193294	6.20191	0.0623337		2.20889	2.08608	0.122802	4.29497	0.057184		2.03611	2.24067	0.204553	4.27678	0.0956576		2.00396	1.50622	0.497741	3.51018	0.283599
Sub05	2.35922	2.1517	0.207518	4.51093	0.0920069		2.64555	2.47181	0.17374	5.11736	0.0679022		1.03333	1.83544	0.802108	2.86877	0.5592		2.56887	2.32093	0.247936	4.8898	0.101409		1.21639	1.95033	0.733943	3.16672	0.463535
Sub06	2.23776	2.13906	0.0987055	4.37682	0.0451037		2.28744	2.34813	0.0606904	4.63556	0.0261847		2.14276	2.65921	0.516445	4.80197	0.215097		1.64726	2.23758	0.590322	3.88484	0.30391		2.09215	1.93519	0.156961	4.02734	0.0779476
Sub07	4.46139	5.63719	1.17581	10.0986	0.232866		3.66772	4.09843	0.430705	7.76615	0.110919		3.35059	3.83268	0.482091	7.18327	0.134226		3.32094	3.92076	0.599819	7.24169	0.165657		3.27154	4.17149	0.899945	7.44303	0.241822
Sub08	2.32141	2.05222	0.269192	4.37363	0.123097		3.36382	2.4186	0.945223	5.78242	0.32693		2.62581	2.21308	0.412732	4.83888	0.17059		2.81563	2.69222	0.123409	5.50785	0.044812		0.973708	1.75806	0.784347	2.73176	0.574243
Sub09	2.93191	2.61049	0.321421	5.5424	0.115986		3.3274	2.89582	0.431577	6.22322	0.138699		3.46553	2.88383	0.581698	6.34936	0.183231		3.13162	3.03305	0.0985677	6.16467	0.0319782		1.7523	2.00666	0.254366	3.75896	0.135338
Sub10	4.96859	4.03348	0.935112	9.00207	0.207755		3.75396	3.96848	0.214519	7.72244	0.0555573		4.56433	4.23727	0.327064	8.8016	0.0743191		5.07607	5.59633	0.520264	10.6724	0.0974972		4.15569	3.85774	0.297953	8.01342	0.0743635
Sub11	2.44869	2.63348	0.184789	5.08218	0.0727204		2.69224	2.69894	0.00669713	5.39118	0.00248448		1.97593	2.54266	0.566729	4.51858	0.250844		2.46164	2.56052	0.0988735	5.02216	0.0393749		1.91958	1.80081	0.11877	3.72039	0.0638481
Sub12	2.41883	2.82223	0.403395	5.24106	0.153936		2.95382	3.20456	0.250743	6.15838	0.0814315		3.08541	3.10908	0.02367	6.1945	0.00764227		2.12859	2.60034	0.471748	4.72894	0.199516		1.7273	1.56638	0.160915	3.29368	0.0977115
Sub13	5.2683	4.11795	1.15035	9.38626	0.245114		4.29974	4.1811	0.118643	8.48084	0.027979		3.70046	4.05431	0.353853	7.75478	0.0912607		4.65884	4.91626	0.257423	9.5751	0.0537692		2.32193	2.70273	0.380801	5.02465	0.151573
Sub14	1.947	1.89974	0.0472594	3.84674	0.0245711		2.08587	2.0065	0.0793633	4.09237	0.038786		1.74164	1.86584	0.124199	3.60748	0.0688566		2.45858	2.45218	0.00639746	4.91076	0.00260549		1.49159	1.56281	0.0712203	3.05439	0.0466347
Sub15	4.59697	3.71246	0.884506	8.30943	0.212892		4.83221	4.91824	0.0860276	9.75045	0.0176459		3.62441	3.72254	0.0981302	7.34694	0.0267132		4.47072	6.31402	1.8433	10.7847	0.341835		2.5703	3.12287	0.552573	5.69317	0.194118
Sub16	3.71233	3.7437	0.0313618	7.45603	0.00841247		3.222	3.55788	0.335883	6.77989	0.0990822		2.95653	2.96536	0.00883315	5.92188	0.00298322		3.09547	3.20079	0.10532	6.29627	0.0334546		2.38122	2.73399	0.352772	5.11521	0.137931
Sub17	2.41293	2.19495	0.217974	4.60788	0.0946095		2.86446	2.87236	0.00790196	5.73681	0.00275482		2.05243	1.76294	0.289486	3.81536	0.151748		3.03243	3.38887	0.356438	6.42129	0.111018		2.57244	2.26882	0.303614	4.84126	0.125428
Sub18	3.23811	3.31613	0.0780275	6.55424	0.0238098		3.81234	3.12872	0.683616	6.94106	0.196978		1.9734	3.23804	1.26464	5.21144	0.485331		3.94533	4.45012	0.504783	8.39545	0.120251		3.25988	3.63536	0.375482	6.89524	0.108911
	De8						De15						In8						In15						Level
	step length R	step length L			SI		step length R	step length L			SI		step length R	step length L			SI		step length R	step length L			SI		step length R	step length L			SI
Sub01	3.52517	3.53761	0.0124464	7.06278	0.0035245		4.08548	3.43367	0.651811	7.51915	0.173374		9.91658	4.83577	5.08081	14.7524	0.688814		4.97455	6.91448	1.93993	11.889	0.326339		4.27036	9.92831	5.65795	14.1987	0.796969
Sub02	4.39191	3.64851	0.743395	8.04042	0.184914		4.08952	4.84415	0.754638	8.93367	0.168942		5.26372	7.80262	2.53889	13.0663	0.388616		5.62699	9.98835	4.36135	15.6153	0.558598		5.01402	7.79851	2.7845	12.8125	0.434652
Sub03	5.1343	4.70313	0.431172	9.83743	0.0876595		5.17101	6.39478	1.22377	11.5658	0.211619		9.28582	13.1218	3.83594	22.4076	0.342379		9.30774	11.0832	1.77548	20.391	0.174144		15.8566	7.79578	8.06087	23.6524	0.68161
Sub04	3.62439	3.76569	0.141303	7.39008	0.0382411		5.22259	4.94737	0.275214	10.17	0.0541229		7.16737	7.04645	0.120917	14.2138	0.017014		7.08649	5.61054	1.47596	12.697	0.232489		5.59609	9.01226	3.41618	14.6083	0.467702
Sub05	3.69065	3.58394	0.106702	7.27459	0.0293357		3.71723	3.80659	0.0893596	7.52382	0.0237538		8.52976	7.3018	1.22797	15.8316	0.155129		7.04566	9.9655	2.91984	17.0112	0.343285		9.71225	7.85564	1.85662	17.5679	0.211365
Sub06	3.41597	3.20402	0.21195	6.61999	0.0640333		3.59325	3.31672	0.276527	6.90997	0.0800372		6.35033	7.84739	1.49705	14.1977	0.210887		8.47463	8.00321	0.471415	16.4778	0.0572181		7.15948	5.96425	1.19524	13.1237	0.182149
Sub07	8.97392	7.83489	1.13904	16.8088	0.135528		9.63798	9.32812	0.309863	18.9661	0.0326754		14.6221	14.176	0.446061	28.7982	0.0309785		8.67166	14.8602	6.18859	23.5319	0.525974		16.0188	13.7848	2.23394	29.8036	0.14991
Sub08	4.56405	3.71679	0.847261	8.28083	0.204632		4.64093	5.00414	0.363214	9.64507	0.0753159		5.51426	9.43246	3.9182	14.9467	0.524289		8.81311	6.22397	2.58913	15.0371	0.344366		7.19892	6.66149	0.537432	13.8604	0.0775492
Sub09	3.57102	4.91193	1.3409	8.48295	0.316141		4.38814	4.2861	0.102044	8.67424	0.0235282		8.6429	6.88255	1.76035	15.5255	0.226769		7.45643	5.40834	2.04808	12.8648	0.318402		10.1739	5.26134	4.91254	15.4352	0.636536
Sub10	7.68467	8.44766	0.762985	16.1323	0.0945908		7.86125	7.33593	0.525325	15.1972	0.0691345		10.6463	8.0791	2.56723	18.7254	0.274197		8.66825	10.5465	1.87821	19.2147	0.195497		10.305	9.69284	0.612121	19.9978	0.0612188
Sub11	5.67403	5.33714	0.336887	11.0112	0.06119		5.6428	5.18177	0.461035	10.8246	0.085183		7.80448	12.8268	5.02228	20.6312	0.486862		12.2603	8.90304	3.35723	21.1633	0.317269		9.5445	12.2697	2.72522	21.8142	0.249858
Sub12	3.99089	3.83466	0.156236	7.82555	0.0399298		4.36063	5.00115	0.640518	9.36178	0.136837		8.02272	7.6312	0.391525	15.6539	0.0500226		5.63167	8.07575	2.44408	13.7074	0.356607		6.82251	5.2756	1.54691	12.0981	0.255727
Sub13	7.30916	9.52296	2.2138	16.8321	0.263045		7.09775	8.71345	1.6157	15.8112	0.204375		7.18092	10.0284	2.84745	17.2093	0.33092		11.6317	9.41366	2.21803	21.0454	0.210786		10.5148	6.04658	4.46822	16.5614	0.539595
Sub14	2.93142	3.84436	0.912943	6.77578	0.269473		4.14372	4.05577	0.0879467	8.1995	0.0214517		6.67547	5.93521	0.740263	12.6107	0.117403		8.56936	6.70665	1.86272	15.276	0.243875		6.82885	4.77299	2.05587	11.6018	0.354404
Sub15	5.8925	7.04995	1.15745	12.9425	0.178862		6.68987	6.46513	0.224742	13.155	0.0341683		13.2569	10.3309	2.92594	23.5878	0.248089		10.3391	13.0652	2.72603	23.4043	0.232951		10.2219	10.2535	0.0316759	20.4754	0.00309404
Sub16	4.77624	6.02351	1.24728	10.7997	0.230983		5.2321	5.72617	0.494073	10.9583	0.0901734		9.2486	6.00818	3.24042	15.2568	0.424784		6.91089	10.8216	3.91067	17.7325	0.441075		8.85503	6.97058	1.88445	15.8256	0.238152
Sub17	3.89556	4.37489	0.479327	8.27045	0.115913		5.3781	5.16786	0.210237	10.546	0.0398706		5.42783	9.48014	4.05231	14.908	0.543643		8.25827	12.5746	4.31634	20.8329	0.414377		9.71826	6.19174	3.52652	15.91	0.443309
Sub18	6.38205	6.38939	0.00733976	12.7714	0.0011494		6.09591	6.16341	0.0674964	12.2593	0.0110114		10.6988	9.45233	1.24647	20.1511	0.123712		12.0603	10.7372	1.32306	22.7975	0.11607		15.1837	10.2124	4.9713	25.3961	0.3915
	De8						De15						In8						In15						Level
	step width R	step width L			SI		step width R	step width L			SI		step width R	step width L			SI		step width R	step width L			SI		step width R	step width L			SI
Sub01	14.2084	17.8959	3.68747	32.1042	0.229719		17.622	15.6885	1.93352	33.3105	0.116091		8.71443	6.83661	1.87782	15.551	0.241504		5.95094	7.61846	1.66752	13.5694	0.245776		9.83495	11.9362	2.10129	21.7712	0.193034
Sub02	14.717	13.0342	1.68284	27.7512	0.121281		15.4949	20.9949	5.50009	36.4898	0.301459		7.68791	9.83585	2.14794	17.5238	0.245146		6.88663	8.59526	1.70863	15.4819	0.220726		7.15407	8.56086	1.40679	15.7149	0.179039
Sub03	69.9202	67.1372	2.78302	137.057	0.040611		49.706	51.1283	1.42226	100.834	0.0282099		15.9421	21.7936	5.85151	37.7357	0.310131		16.8844	18.5292	1.64482	35.4136	0.0928918		20.9991	19.8764	1.12273	40.8755	0.0549342
Sub04	19.7238	15.3434	4.38041	35.0672	0.249829		20.4548	18.451	2.00376	38.9058	0.103006		11.2695	8.10349	3.16598	19.373	0.326845		10.1315	7.94612	2.18534	18.0776	0.241774		7.44119	9.72722	2.28602	17.1684	0.266306
Sub05	13.8984	13.7103	0.188124	27.6087	0.0136279		14.1774	13.7752	0.40218	27.9526	0.0287759		6.76204	8.50062	1.73859	15.2627	0.227822		9.06252	9.28488	0.222353	18.3474	0.0242381		6.15494	7.88546	1.73052	14.0404	0.246506
Sub06	17.739	16.3139	1.42516	34.0529	0.0837024		22.5416	22.3641	0.17746	44.9057	0.00790369		8.87145	9.80853	0.937086	18.68	0.100331		10.6413	9.84043	0.800883	20.4817	0.0782046		6.57826	5.81865	0.759607	12.3969	0.122548
Sub07	23.1543	21.0122	2.14211	44.1665	0.0970014		24.8006	23.8565	0.944036	48.6571	0.0388036		9.44199	8.60822	0.83377	18.0502	0.0923835		8.08748	8.65397	0.566481	16.7414	0.0676741		6.61262	5.77049	0.842129	12.3831	0.136012
Sub08	22.7311	18.2147	4.51634	40.9458	0.220601		12.7856	18.4585	5.67294	31.244	0.363137		7.97334	7.68159	0.291754	15.6549	0.0372732		9.32623	7.029	2.29724	16.3552	0.280918		6.85357	6.86457	0.0109925	13.7181	0.00160262
Sub09	12.3692	12.6178	0.248604	24.9869	0.0198987		13.5992	13.7722	0.172996	27.3713	0.0126406		6.59989	5.24551	1.35438	11.8454	0.228675		6.83966	5.65724	1.18243	12.4969	0.189235		6.36085	5.8207	0.540147	12.1816	0.0886828
Sub10	17.5966	19.1464	1.54989	36.743	0.0843639		19.6665	24.446	4.77948	44.1126	0.216695		13.5956	11.8638	1.73186	25.4594	0.136048		13.1414	13.0373	0.104036	26.1787	0.00794811		12.6987	11.9349	0.763712	24.6336	0.0620057
Sub11	20.0657	23.2369	3.1712	43.3026	0.146467		23.3473	19.8529	3.49436	43.2002	0.161775		9.45613	13.7724	4.31624	23.2285	0.371633		14.3535	11.5799	2.77365	25.9334	0.213905		7.38365	11.4783	4.09466	18.862	0.434171
Sub12	19.1372	18.8073	0.329913	37.9444	0.0173893		19.2859	20.8057	1.51974	40.0916	0.0758131		7.92825	6.4501	1.47815	14.3783	0.205608		9.12478	12.0443	2.9195	21.1691	0.275827		7.13766	6.02746	1.1102	13.1651	0.168657
Sub13	23.2632	25.7441	2.48081	49.0073	0.101242		29.4261	32.4855	3.05944	61.9116	0.0988325		19.0686	24.873	5.80432	43.9416	0.264184		23.4478	15.849	7.59878	39.2968	0.386738		24.8568	17.6837	7.17314	42.5405	0.337238
Sub14	22.9636	26.4488	3.48523	49.4125	0.141067		25.1148	20.4349	4.67992	45.5497	0.205487		9.64363	6.9176	2.72603	16.5612	0.329206		12.1499	10.4647	1.68522	22.6146	0.149039		9.02833	6.90512	2.12322	15.9334	0.26651
Sub15	25.2008	22.265	2.93584	47.4658	0.123703		24.7492	22.7368	2.01245	47.486	0.0847597		15.5144	11.7126	3.80179	27.227	0.279266		9.46169	11.425	1.96327	20.8867	0.187992		7.60598	7.34412	0.261859	14.9501	0.035031
Sub16	18.7973	21.0764	2.27902	39.8737	0.114312		11.4724	14.2294	2.75696	25.7018	0.214535		9.60549	9.23657	0.368919	18.8421	0.0391591		7.26354	8.81605	1.55251	16.0796	0.193103		8.6993	6.89918	1.80012	15.5985	0.230807
Sub17	13.8883	15.0824	1.19413	28.9707	0.0824373		10.6448	12.2116	1.5668	22.8565	0.137099		7.3536	8.08661	0.733013	15.4402	0.0949485		6.15126	9.12653	2.97527	15.2778	0.38949		8.28981	6.103	2.18682	14.3928	0.303876
Sub18	28.862	27.0173	1.84469	55.8792	0.0660241		35.0409	32.3545	2.68643	67.3955	0.0797215		11.0606	11.4804	0.419781	22.541	0.0372459		12.7914	10.6764	2.11498	23.4678	0.180245		11.1661	9.07159	2.09454	20.2377	0.206994
