# Supplementary material for: Walking on different inclines affects gait symmetry differently in the anterior-posterior and vertical directions: implication for future sensorimotor training
Source: PeerJ. 2024 Sep 16;12:e18096. doi: 10.7717/peerj.18096 (PMC11412221; doi:10.7717/peerj.18096)
Supplement: Supplemental Information 2 — Data of heel clearance was from a gait cycle of a participant in this study while walking on the level treadmill. [file peerj-12-18096-s002.xlsx]

## Sheet: Sheet1
Percent of gait cycle	Heel clearance
1	2.418
2	3.305
3	4.932
4	6.922
5	8.762
6	10.376
7	11.656
8	12.901
9	13.543
10	13.683
11	13.839
12	13.882
13	13.967
14	13.986
15	14.04
16	14.161
17	14.461
18	14.848
19	14.878
20	15.322
21	15.633
22	15.964
23	16.428
24	16.914
25	16.837
26	17.098
27	17.367
28	17.849
29	18.332
30	18.503
31	19.216
32	19.759
33	20.487
34	21.134
35	21.951
36	22.832
37	23.829
38	24.75
39	25.937
40	27.268
41	28.9
42	30.717
43	33.142
44	36.043
45	39.537
46	43.577
47	48.526
48	54.07
49	60.486
50	67.832
51	76.07
52	85.421
53	95.819
54	107.365
55	120.454
56	134.731
57	150.326
58	166.785
59	183.681
60	200.766
61	217.296
62	232.118
63	243.851
64	251.793
65	256.757
66	259.3
67	260.218
68	259.675
69	257.075
70	252.403
71	245.688
72	237.136
73	227.081
74	215.465
75	202.538
76	188.416
77	173.602
78	157.805
79	141.515
80	125.158
81	108.172
82	92.315
83	76.574
84	61.833
85	48.514
86	37.115
87	27.522
88	19.975
89	14.517
90	11.009
91	9.025
92	8.078
93	7.513
94	6.933
95	5.582
96	3.353
97	0.814
98	1.873
99	1.542
100	2.204
